## Volume 2 Summer Issue

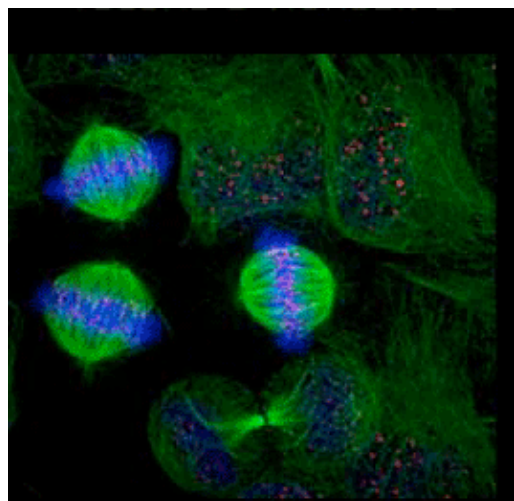

### Table of Contents

Use Arrows to Browse  
Previous Issues

### Contact CBE

8120 Woodmont Avenue Suite  
750  
Bethesda, Maryland 20814-  
2762  
Phone: (301) 347-9300  
Fax: (301) 347-9350  
[cbe@ascb.org](mailto:cbe@ascb.org)

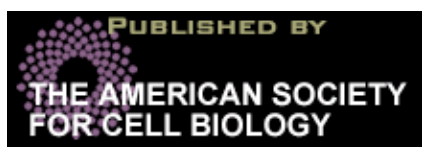

## ESSAY

- **Inquiry-Based Undergraduate Teaching in the Life Sciences at Large Research Universities: A Perspective on the Boyer Commission Report**  
by William B. Wood

## ARTICLES

- **Evaluating a Science Diversity Program at UC Berkeley: More Questions Than Answers**  
by John Matsui, Roger Liu, and Caroline M. Kane
- **The Promise of New Ideas and New Technology for Improving Teaching and Learning**  
by Joseph D. Novak

## FEATURES

- **Approaches to Cell Biology Teaching: Learning Content in Context— Problem-Based Learning**  
by Deborah Allen and Kimberly Tanner
- **WWW.Cell Biology Education**  
by Robert Blystone
- **Fueling Educational Reform: *Bio2010*—Biology for the Future**  
by Kerry Brenner
- **Commentary: *Bio2010*—New Challenges for Biology Educators**  
by Joan A. Steitz

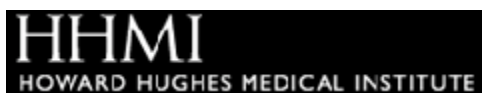

Supported in part by an Undergraduate Science Education Program grant from the Howard Hughes Medical Institute

by Joan A. Steitz

- **Review of: *Bio2010: Transforming Undergraduate Education for Future Research Biologists*, by the National Research Council**  
**[Bio2010: Read It!](#)**  
by Douglas Fambrough
- **Review of: *Cell Biology*, by T.D. Pollard and W.C. Earnshaw**  
**[Experiencing Cellularity](#)**  
by Ursula Goodenough
- **Review of: *Genetic Techniques for Biological Research: A Case Study Approach*, by Corrine A. Michels**  
**[The Awesome Power of Genetics Education](#)**  
by Mark Rose

## ESSAY

---

- **[Public Access for Teaching Genomics, Proteomics, and Bioinformatics](#)**  
by A. Malcolm Campbell

## ANNOUNCEMENTS

---

September 3–7, 2005, Sydney, Australia  
**[15th International Society of Developmental Biologists Congress](#)**

**[Submit Your Manuscript](#)**  
[Online Manuscript Submission](#)

- **[Instructions to Authors](#)**
- **[Top Ten Reasons to Publish in CBE](#)**  
[\[pdf\]](#)

**Other Information:**

There are **6,450** registered users signed up to receive quarterly notification of new content.

[Become a registered user.](#)

[Order a Free CBE Poster](#)

*On the Cover* [\[Printable Cover\]](#)

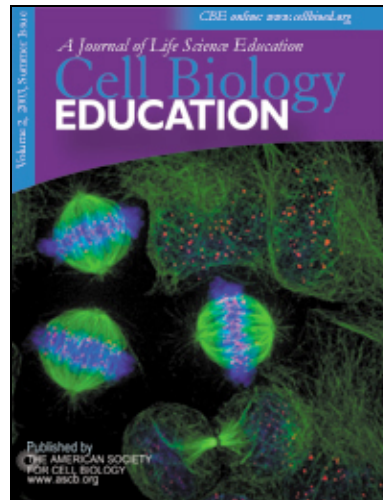

Cell division in human cells. Human epithelial (HeLa) cells were fluorescently labeled for microtubules (green), kinetochores (pink/red), and DNA (blue). Digital

images were collected with a Yokogawa CSU-10 spinning Nipkow disk confocal and Hamamatsu ORCA-ER cooled CCD camera mounted on a Nikon TE2000 inverted microscope. The images were then deconvolved, pseudo-colored, and merged using MetaMorph software. Three metaphase mitotic cells are visible with condensed chromosomes aligned at the bipolar spindle equator. A late telophase cell undergoing cytokinesis is also present. Image courtesy of Adrian Salic and Jennifer Waters Shuler, Nikon Imaging Center at Harvard Medical School, Dept. of Cell Biol., 240 Longwood Ave., Boston, MA 02115. E-mail: [jshuler@hms.harvard.edu](mailto:jshuler@hms.harvard.edu).
